# Supplementary material for: Mechanochromic photoluminescence in a dinuclear alkynyl copper(i) complex with an extremely short Cu(i)⋯Cu(i) separation
Source: Royal Society of Chemistry journal article supplement (doi:10.1039/d3nj05209e), 2024-01-01
Supplement: d3nj05209e1.pdf [file d3nj05209e1.pdf]

## Mechanochromic photoluminescence in a dinuclear alkynyl copper(I) complex with in an extremely short Cu(I)⋯Cu(I) separation

J. Moussa, F. Juliá, L. M. Chamoreau and P. González-Herrero

### Experimental

General experimental methods: All reactions were carried out under an argon atmosphere using Schlenk tube techniques. Diethyl ether was distilled from sodium–benzophenone, CH<sub>3</sub>CN was distilled from CaH<sub>2</sub>. <sup>1</sup>H-NMR spectra were recorded at 300.13 MHz, <sup>13</sup>C NMR spectra were recorded at 75.61 MHz, <sup>31</sup>P NMR spectra were recorded at 121.49 MHz in CD<sub>2</sub>Cl<sub>2</sub>. the *bis*-1,2-diphenylphosphinobenzene (dppb) ligand was prepared according to a procedure described in the literature.<sup>1</sup> Other reagents were obtained from commercial suppliers and used as received. Infra-red spectra were measured using Tensor 27 (ATR diamond) Bruker spectrometer. IR data are reported as characteristic bands (cm<sup>-1</sup>).

### Photophysical characterization

UV-vis absorption spectra were registered on a Perkin-Elmer Lambda 750S spectrophotometer. Emission spectra were measured using a Jobin Yvon Fluorolog 3-22 spectrofluorometer with a 450 W xenon lamp, double-grating monochromators, and a TBX-04 photomultiplier. Measurements in frozen 2-MeTHF glasses were carried out in a right angle configuration using 5 mm quartz NMR tubes and a liquid nitrogen Dewar with quartz windows. Measurements in the solid state were carried out in front face configuration using solid samples supported between quartz coverslips. An Oxford Instruments Optistat-DN cryostat was employed for low-temperature measurements in the solid state. Lifetimes were determined using the Fluorolog's FL-1040 phosphorimeter accessory ( $\tau > 10 \mu\text{s}$ ) or a IBH FluoroHub controller in TCSPC mode using a 372 nm pulsed NanoLED source ( $\tau < 10 \mu\text{s}$ ); the estimated uncertainty is  $\pm 10\%$  or better. Emission quantum yields were determined using a Hamamatsu C11347 Absolute PL Quantum Yield Spectrometer; the estimated uncertainty is  $\pm 5\%$  or better.

Crystal data for **1**. Yellow prismatic crystals: C<sub>76</sub>H<sub>58</sub>P<sub>4</sub>Cu<sub>2</sub>, triclinic, P-1,  $a = 10.7851(3)$ ,  $b = 12.7214(4)$ ,  $c = 12.9752(4)$  Å,  $\alpha = 66.4000(10)$ ,  $\beta = 73.5420(10)$ ,  $\gamma = 72.6740(10)^\circ$ ,  $V = 1529.66(8)$  Å<sup>3</sup>,  $Z = 1$ ,  $T = 200(2)$  K,  $m = 2.179$  mm<sup>-1</sup>, 28238 reflections measured, 5556 independent ( $R_{\text{int}} = 0.0162$ ), 371 parameters, no restraints, final  $R$  indices  $R_1 [I \geq 2\sigma(I)] = 0.0250$  and  $wR_2$  (all data) = 0.680, GOF on  $F^2 = 1.044$ , max/min residual electron density = 0.26/-0.27 e.Å<sup>-3</sup>.

A single crystal of the compound was selected, mounted onto a cryoloop, and transferred in a cold nitrogen gas stream. Intensity data were collected at 200K with a BRUKER Kappa-APEXII diffractometer with micro-focused Cu-K $\alpha$  radiation. APEX 3 suite and SAINT program (BRUKER) were used to carry out data collection, unit-cell parameters refinement, integration and data reduction. SADABS (BRUKER) was used for scaling and multi-scan absorption corrections. In the Olex2 suite<sup>2</sup>, the structure was solved with Sir92<sup>3</sup> program and refined by full-matrix least-squares methods using SHELXL-14<sup>4</sup>.

CCDC 1943516 contains the supplementary crystallographic data for this paper. The data can be obtained free of charge from The Cambridge Crystallographic Data Centre via [www.ccdc.cam.ac.uk/structures](http://www.ccdc.cam.ac.uk/structures).

Synthesis of complex [Cu( $\mu^2$ - $\eta^1$ -C $\equiv$ CPh)(dppb)]<sub>2</sub> (**1**): To a solution of [Cu(CH<sub>3</sub>CN)<sub>4</sub>]BF<sub>4</sub> (200 mg; 0.64 mmol) and suspended cesium carbonate (210 mg; 0.64 mmol) in acetonitrile (20 mL) was

added phenylacetylene (70 mg; 0.68 mmol) at 0°C. The mixture was stirred and allowed to warm up to room temperature during 4 hours. Then, dppb (285 mg; 0.64 mmol) solid was added at once and the mixture was stirred at room temperature overnight. Finally the mixture was filtered through a pad of celite. Slow evaporation of the solvent gave a green/yellow microcrystalline solid (310 mg; 0,52 mmol). Yield: 81%.

Anal. Calcd. (%) for  $C_{38}H_{29}CuP_2 \cdot 2CH_3CN$  (692,16 g.mol<sup>-1</sup>): C 72.77, H 5.09; found: C 72.07, H 4.74.

<sup>1</sup>H-NMR (300.13 MHz, CD<sub>2</sub>Cl<sub>2</sub>):  $\delta$  = 7.54-6.96 (m, 29 H, *dppb* + phenylalkynyl) ppm.

<sup>13</sup>C{<sup>1</sup>H}-NMR (75.47 MHz, CD<sub>2</sub>Cl<sub>2</sub>):  $\delta$  = 125.6 (s); 128.7 (s); 128.8 (t,  $J_{CP}$  = 4.2 Hz); 129.2 (s); 129.6 (t,  $J_{CP}$  = 2.6 Hz); 130.3 (s); 131.2 (s); 132.3 (s); 132.6 (s); 133.6 (t,  $J_{CP}$  = 2.6 Hz); 135.0 (t,  $J_{CP}$  = 4.3 Hz); 135.3 (s) ppm.

<sup>31</sup>P{<sup>1</sup>H}-NMR (121.49 MHz, CD<sub>2</sub>Cl<sub>2</sub>):  $\delta$  = -9.99 (broad), *dppb*) ppm.

IR (ATR):  $\nu$  = 2039 cm<sup>-1</sup> (-C≡C-)

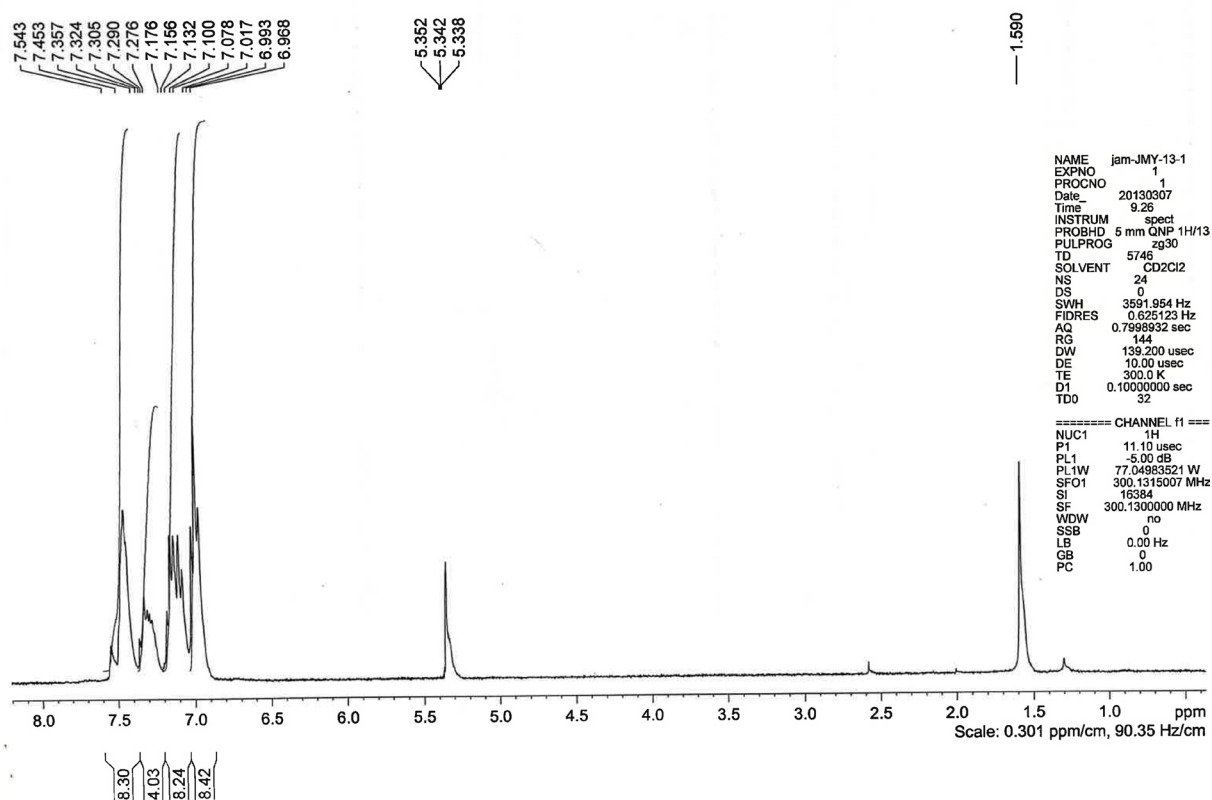

Figure S1: <sup>1</sup>H-NMR spectrum of complex **1** in CD<sub>2</sub>Cl<sub>2</sub>

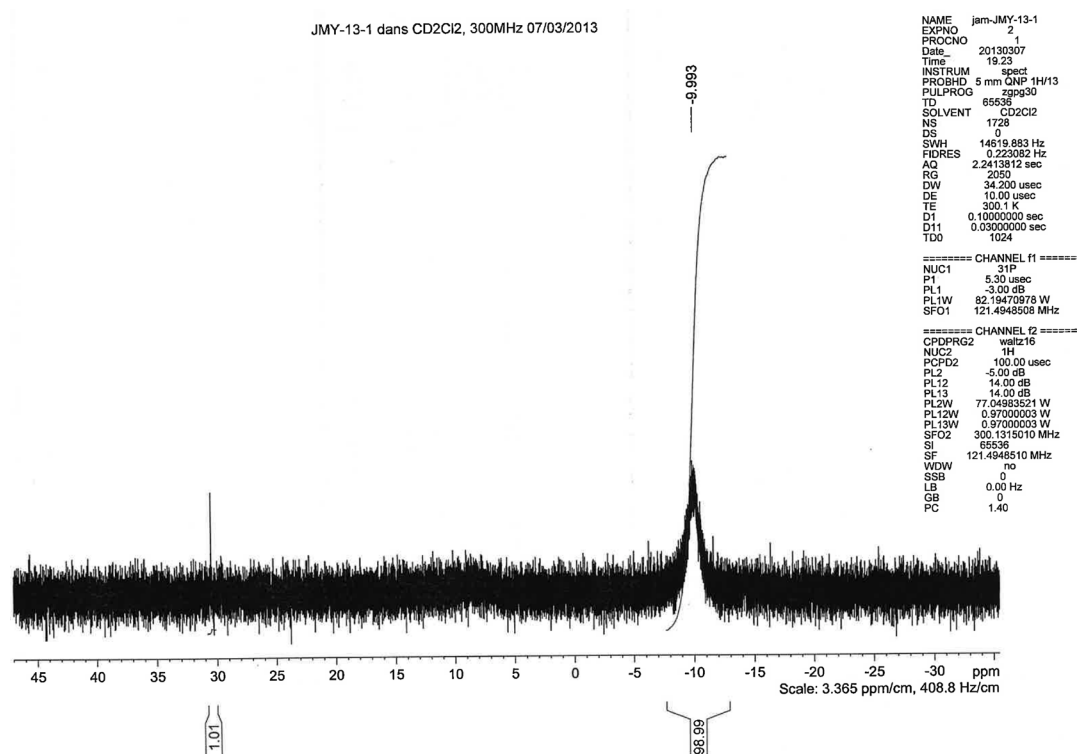

Figure S2: <sup>31</sup>P-NMR spectrum of complex **1** in CD<sub>2</sub>Cl<sub>2</sub>

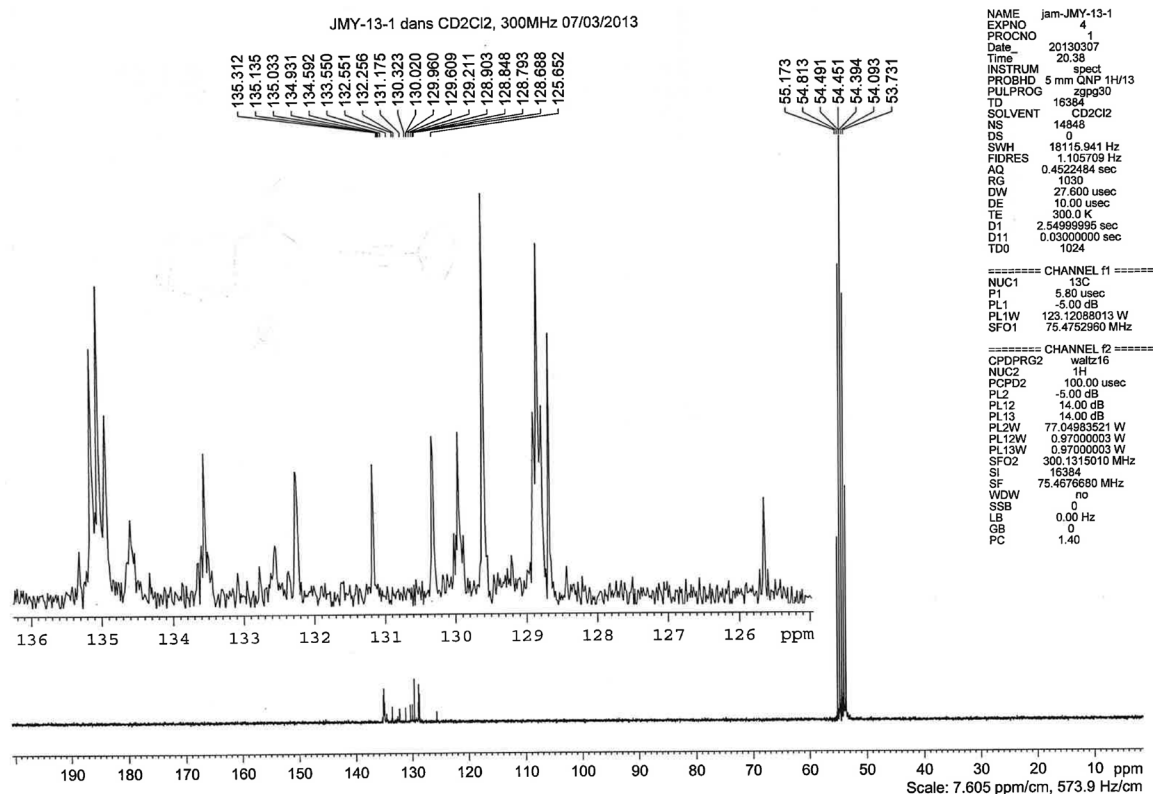

Figure S3: <sup>13</sup>C-NMR spectrum of complex **1** in CD<sub>2</sub>Cl<sub>2</sub>

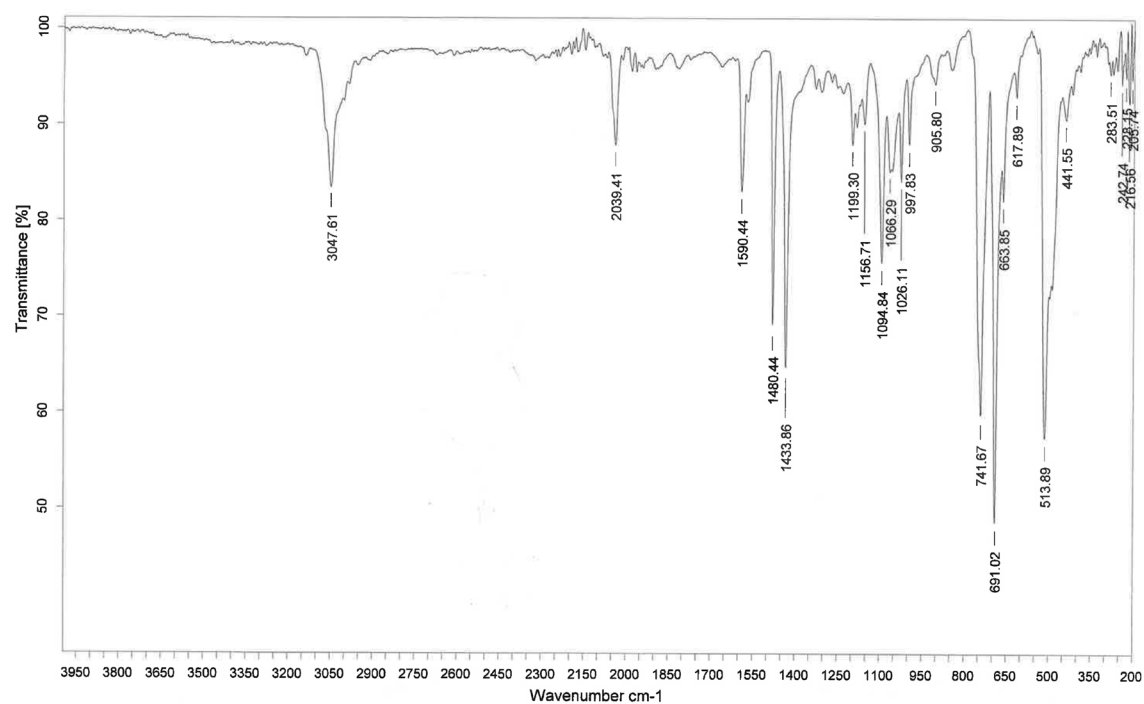

Figure S4: IR spectrum of complex **1** ATR technique

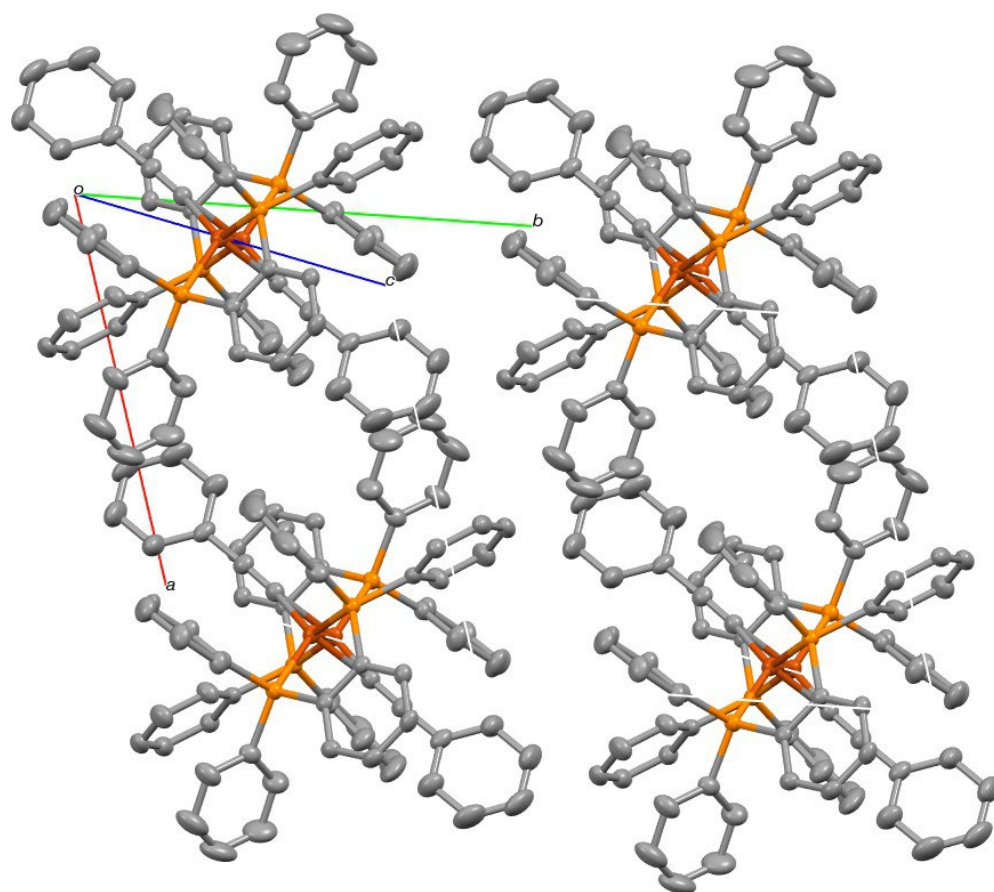

Figure S5: View of the unit cell showing the absence of  $\pi$ -stacking or similar interactions in the crystal structure of complex **1**

---

<sup>1</sup> Tunney, S. E.; Stille, J. K., *J. Org. Chem.* 1987, **52**, 748.

<sup>2</sup> O. V. Dolomanov, L. J. Bourhis, R. J. Gildea, J. A. K. Howard, H. Puschmann, *J. Appl. Cryst.* 2009, **42**, 339

<sup>3</sup> A. Altomare, G. Cascarano, C. Giacovazzo, A. Guagliardi, M. C. Burla, G. Polidori, et M. Camalli, *J. Appl. Cryst.* 1994, **27**, 435

<sup>4</sup> G. M. Sheldrick, *Acta Crystallographica Section C* 2015, **71**, 3
